# Supplementary material for: The Unfinished Journey:multifactorial analysis of untransferred cycles in IVF
Source: Research Square preprint supplement (doi:10.21203/rs.3.rs-7368769/v1), 2025-09-17
Supplement: Supplementary file 1 [file 2efb02693dc59c776acf783b.xlsx]

## Sheet: Table 2
	Table 2 Reasons for untransferred frozen-thawed IVF cycles
Untransplanted frozen-thawed cycles（medical factors）	Percentage (%) (number of cases)	Untransplanted frozen-thawed cycles（non-medical factors）	Percentage (%) (number of cases)
Failed to develop into blastocyst	51.34%（210）	Upper respiratory tract infectioner	34.73%（58）
uterine cavity factors	11%（45）	Personal reasons	28.14%（47）
Abnormal labs results (TSH, liver/kidney function)	9.29%（38）	Pandemic-related reasons	21.56%（36）
Vaginitis	7.82%（32）	Social reasons	14.37%（24）
Post-thaw PGT screening	6.85%（28）	Non-adherence	1.2%（2）
Comorbidities (bleeding, infection, trauma, tumors)	5.87%（24）	Total	167
Embryo disintegration	4.16%（17）
Infectious disease (endometritis, UTI, HSV)	2.2%（9）
Difficult transfer requiring re-freezing	1.47%（6）
Total	409
