# Supplementary material for: The Unfinished Journey:multifactorial analysis of untransferred cycles in IVF
Source: Research Square preprint supplement (doi:10.21203/rs.3.rs-7368769/v1), 2025-09-17
Supplement: Supplementary file 2 [file 602125e3ce7ec5b5a94d49ea.xlsx]

## Sheet: Table 1
	Table 1 Reasons for untransferred fresh IVF cycles
Untransplanted fresh embryo cycle（medical factors）	Percentage (%) (number of cases)	Untransplanted fresh embryo cycle（non-medical factors）	Percentage (%) (number of cases)
OHSS risk	26.54%（7219）	Personal reasons	82.15%（2426）
PPOS	20.8%（5657）	Social reasons	10.9%（322）
uterine cavity factors	14.88%（4048）	Upper respiratory tract infectioner	3.15%（93）
Luteal-phase stimulation	9.57%（2604）	Pandemic-related reasons	2.95%（87）
No usable embryos	8.39%（2282）	Conceived during cycle	0.85%（25）
elevated progesterone levels	7.31%（1988）	Total	2953
no usable oocytes	5.58%（1519）
PGT	3.31%（901）
Embryo accumulation	1.26%（342）
Elective oocyte cryopreservation	1.04%（284）
Poor ovarian response	0.65%（176）
Elevated CA125 levels	0.24%（66）
Hydrosalpinx	0.22%（61）
Vaginitis	0.2%（55）
Total	27202
